# Supplementary material for: Effect of spin–phonon interactions on Urbach tails in flexible [M2(bdc)2(dabco)]
Source: Royal Society of Chemistry journal article supplement (doi:10.1039/d0cp01944e), 2020-01-01
Supplement: d0cp01944e1.pdf [file d0cp01944e1.pdf]

## Supplementary information to

### Effect of spin-phonon interaction on Urbach tails in flexible $[M_2(\text{bdc})_2(\text{dabco})]$

S.G. Kozlova, M.R. Ryzhikov, V.R. Shayapov, D.G. Samsonenko

Nikolaev Institute of Inorganic Chemistry, Siberian Branch, Russian Academy of Sciences,  
Lavrentyev Av., 3, RU-630090 Novosibirsk, Russian Federation. E-Mail: [sgk@niic.nsc.ru](mailto:sgk@niic.nsc.ru)

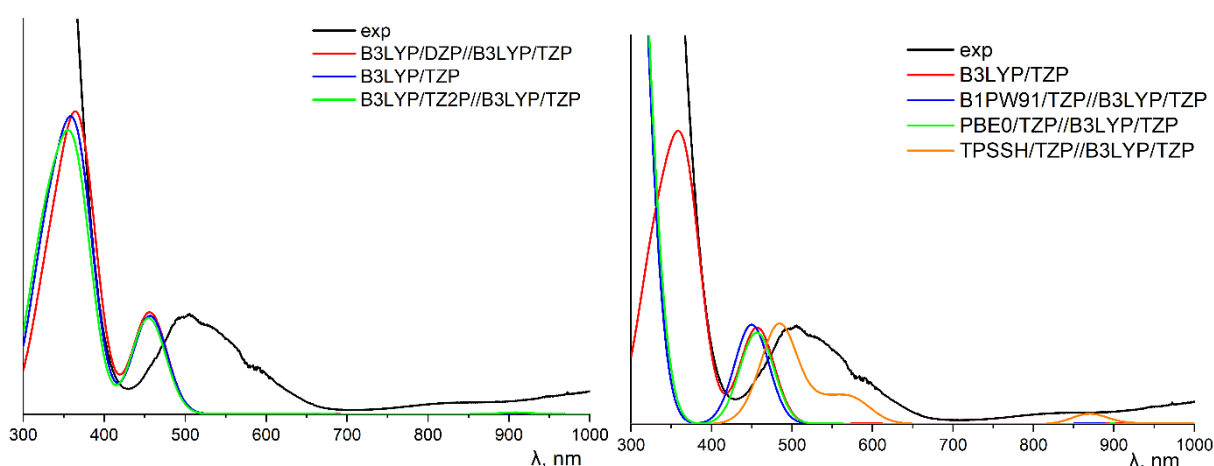

Fig. S1. Stability of the calculated absorption spectra relative to the basis set size (left) and density functional choice (right) for Co-DMOF. The absorption spectra calculated by B3LYP functional provide best reproduction of Kubelka—Munk functions in the region of intense absorption (300-400 nm).

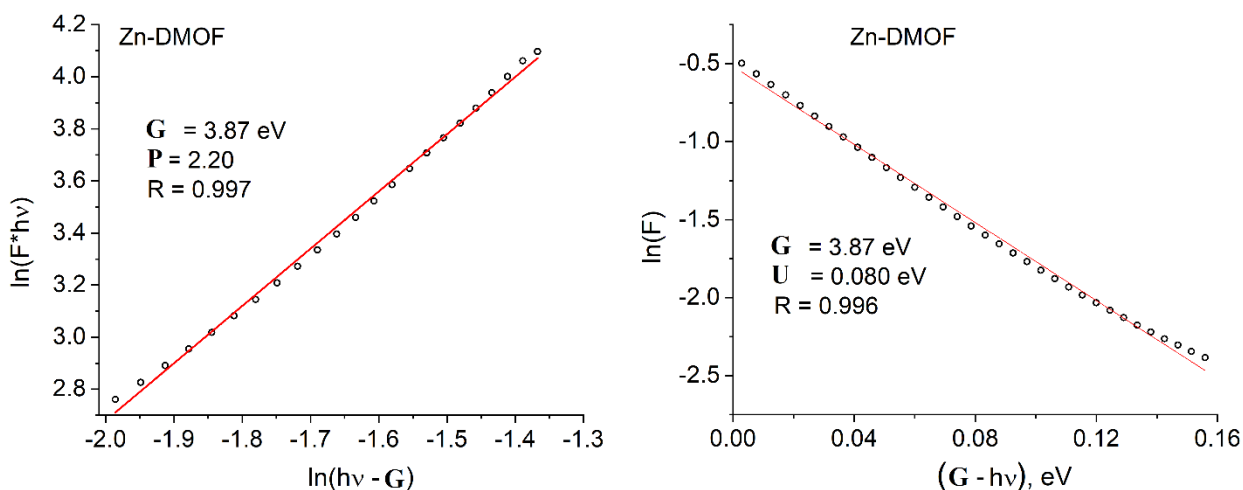

Fig. S2. Determining exponents P and U for Zn-DMOF.

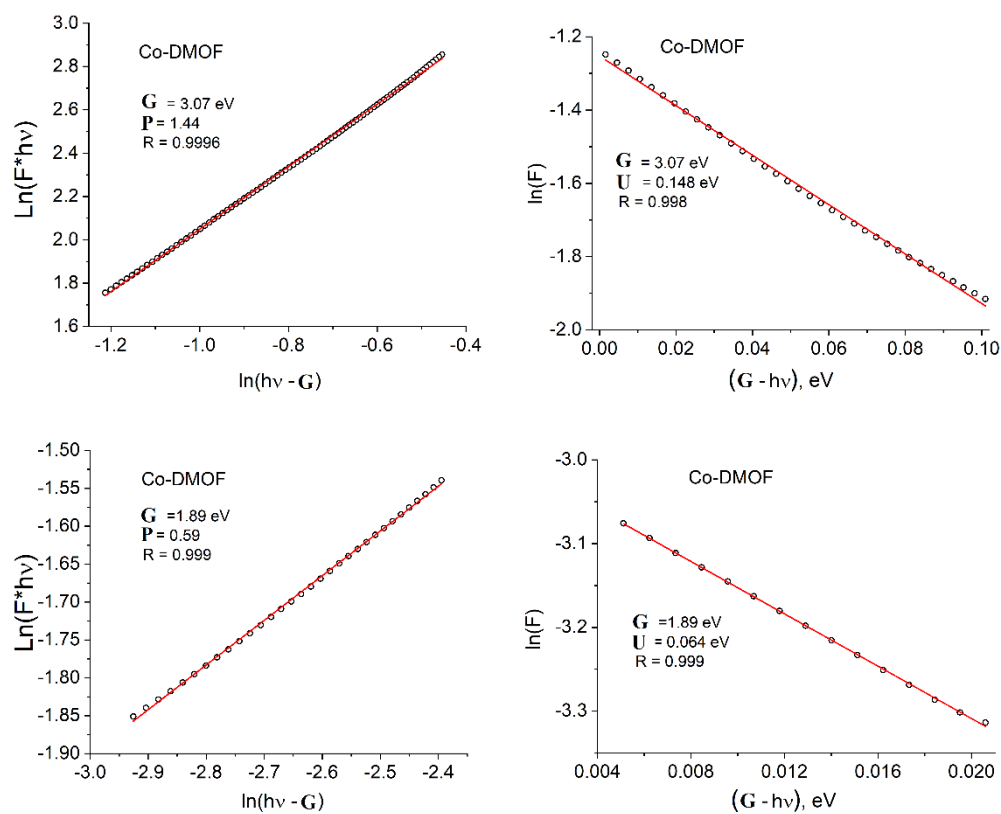

Fig. S3. Determining exponents P and U for Co-DMOF.

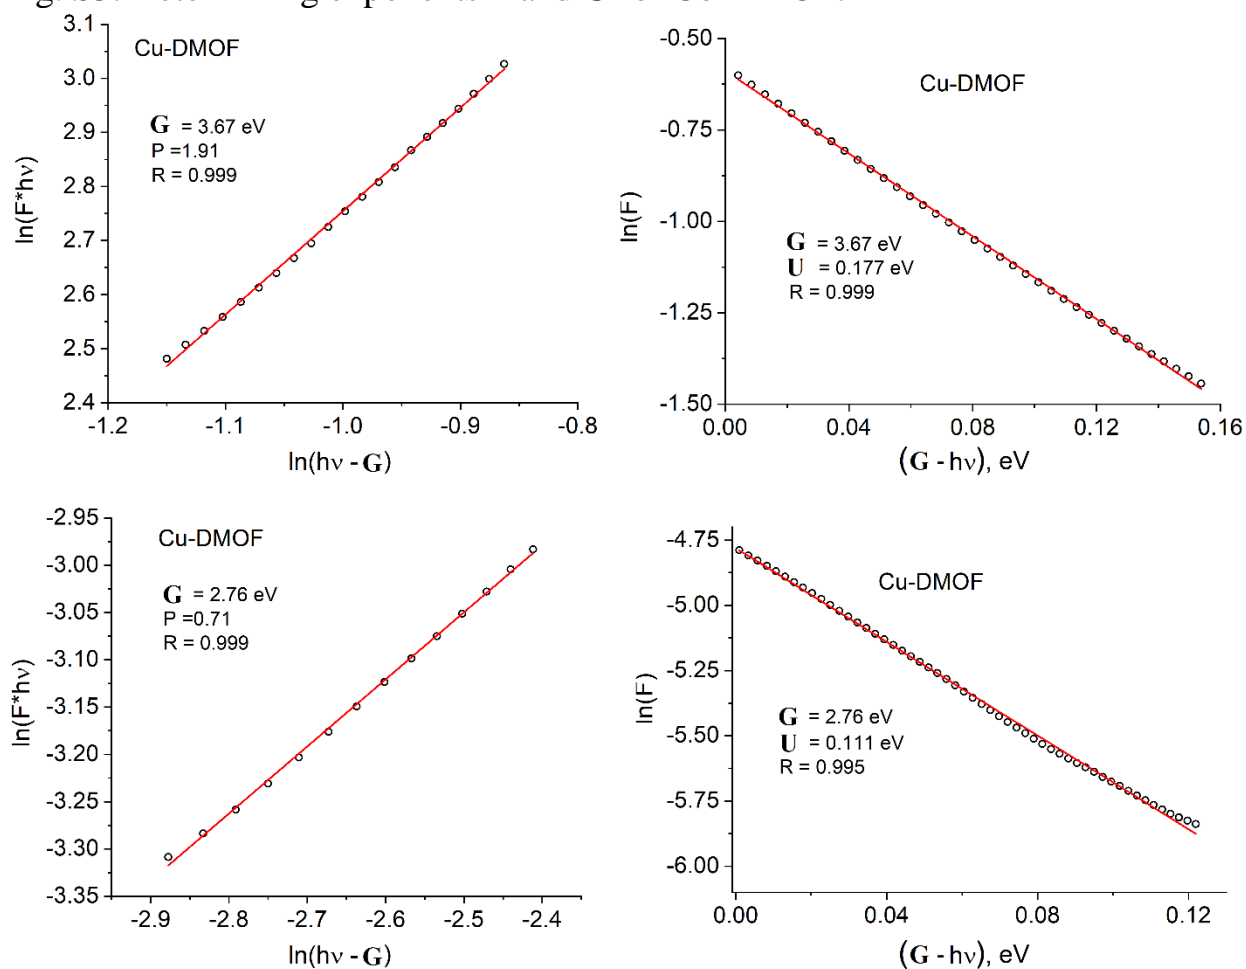

Fig. S4. Determining exponents P and U for Cu-DMOF.

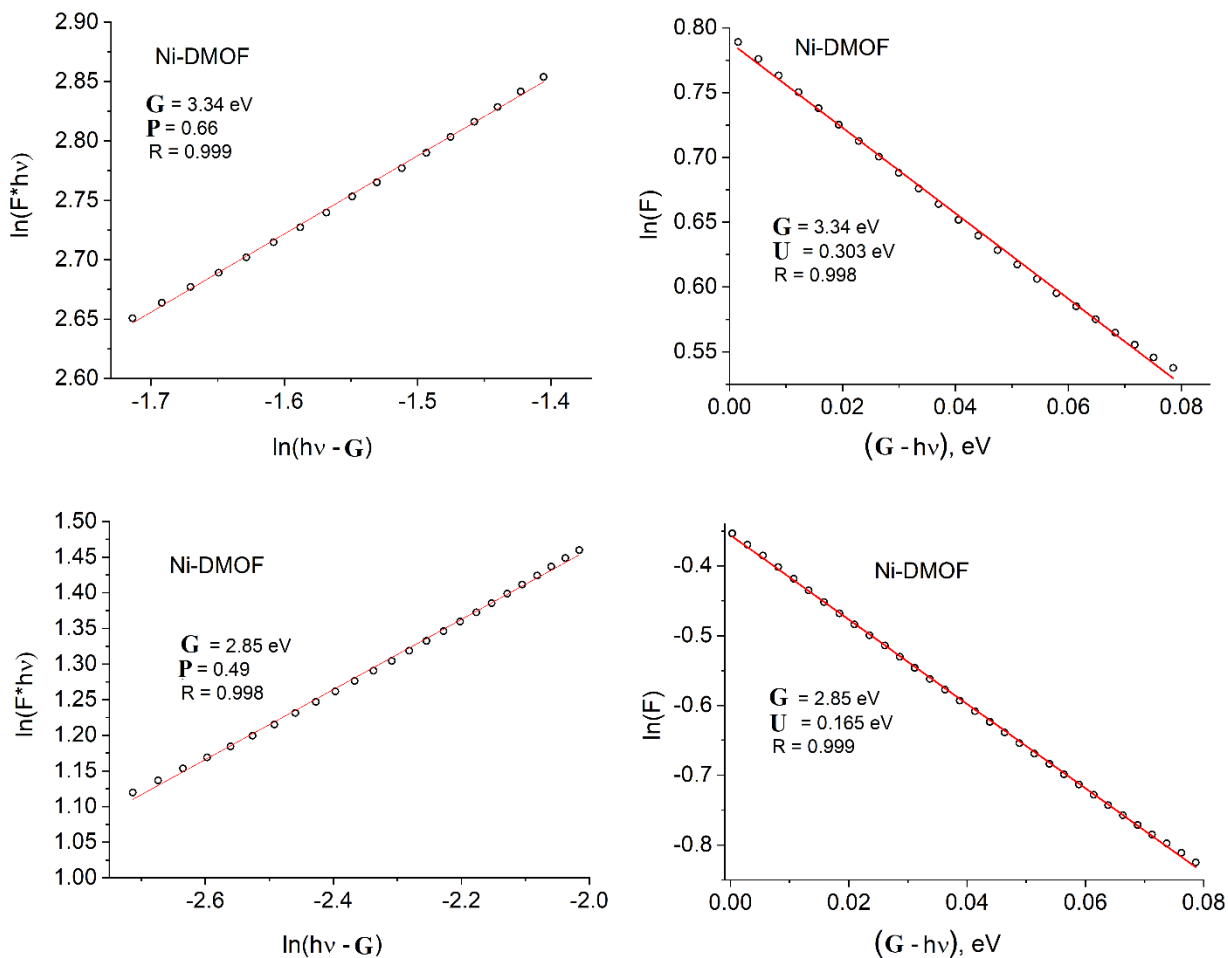

Fig. S5\_1. Determining exponents  $P$  and  $U$  for Ni-DMOF.

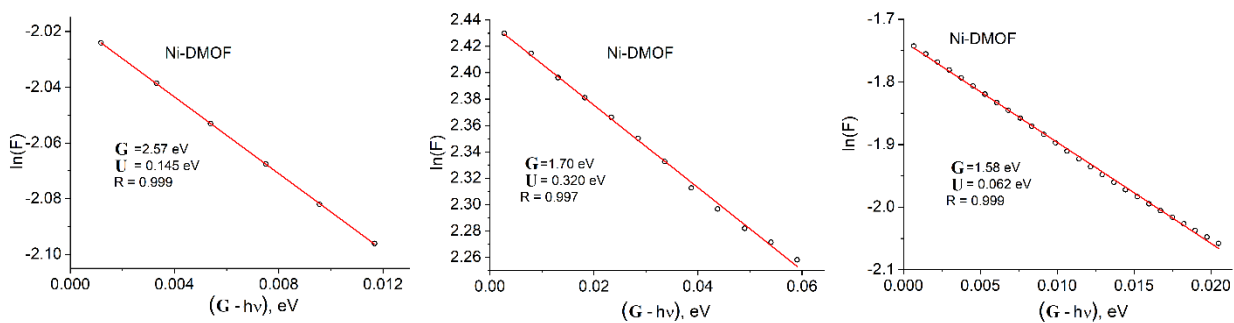

Fig. S5\_2. Determining  $U$  for Ni-DMOF.

Table S1. Optimized geometry parameters for the  $M_2(O_2CH)_4$  paddle-wheel model system.

|                 | M-M, Å | M-O, Å | O-C, Å | <M-M-O, ° | <O-M-M-O, ° |
|-----------------|--------|--------|--------|-----------|-------------|
| $Zn_2(O_2CH)_4$ | 2.650  | 2.028  | 1.262  | 84.6      | 0.0         |
| $Cu_2(O_2CH)_4$ | 2.506  | 1.965  | 1.263  | 86.6      | 0.0         |
| $Ni_2(O_2CH)_4$ | 2.674  | 1.982  | 1.262  | 84.1      | 0.0         |
| $Co_2(O_2CH)_4$ | 2.583  | 2.006  | 1.263  | 85.4      | 0.0         |

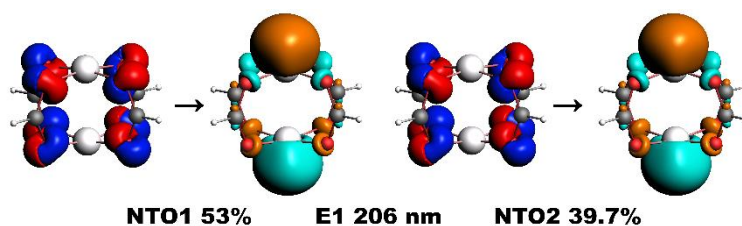

Fig. S6. NTOs for the most intense transition in  $Zn_2(O_2CH)_4$

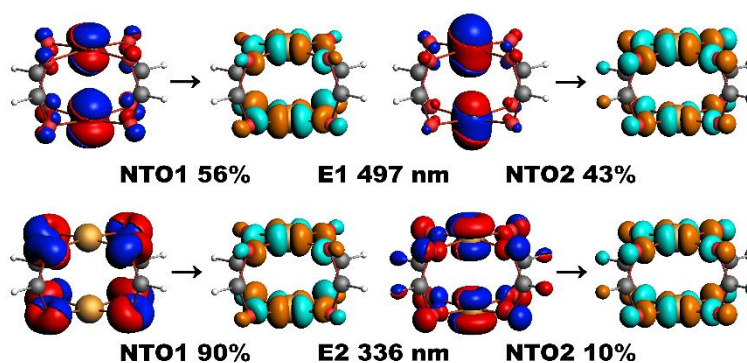

Fig. S7. NTOs for some most intense transitions in  $Cu_2(O_2CH)_4$

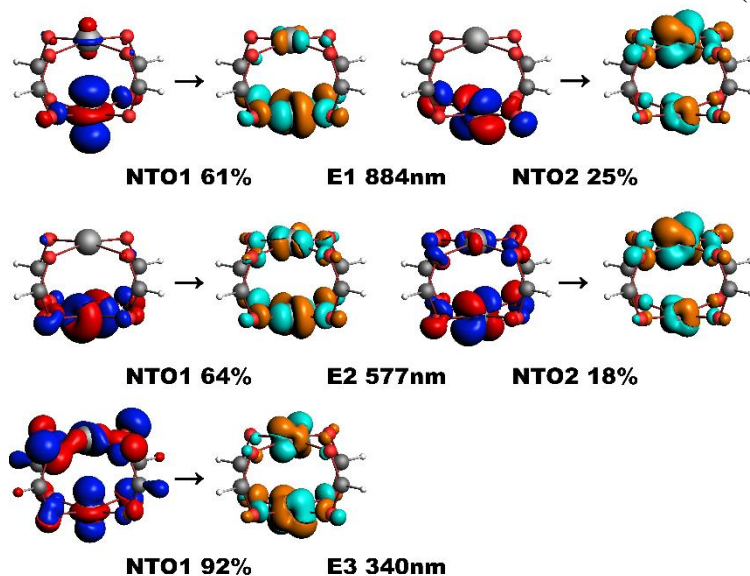

Fig. S8. NTOs for some most intense transitions in  $Ni_2(O_2CH)_4$

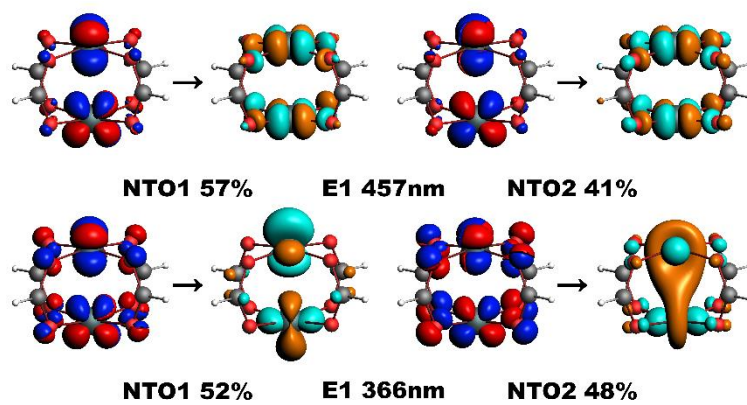

Fig. S9. NTOs for some most intense transitions in  $\text{Co}_2(\text{O}_2\text{CH})_4$
